# Supplementary material
Source: PubMed Central journal article supplement (PMC11748912)
Supplement: hcv-18-e014665-s001.pdf [file hcv-18-e014665-s001.pdf]

## SUPPLEMENTAL MATERIAL

Figure S1: Strut remnant types

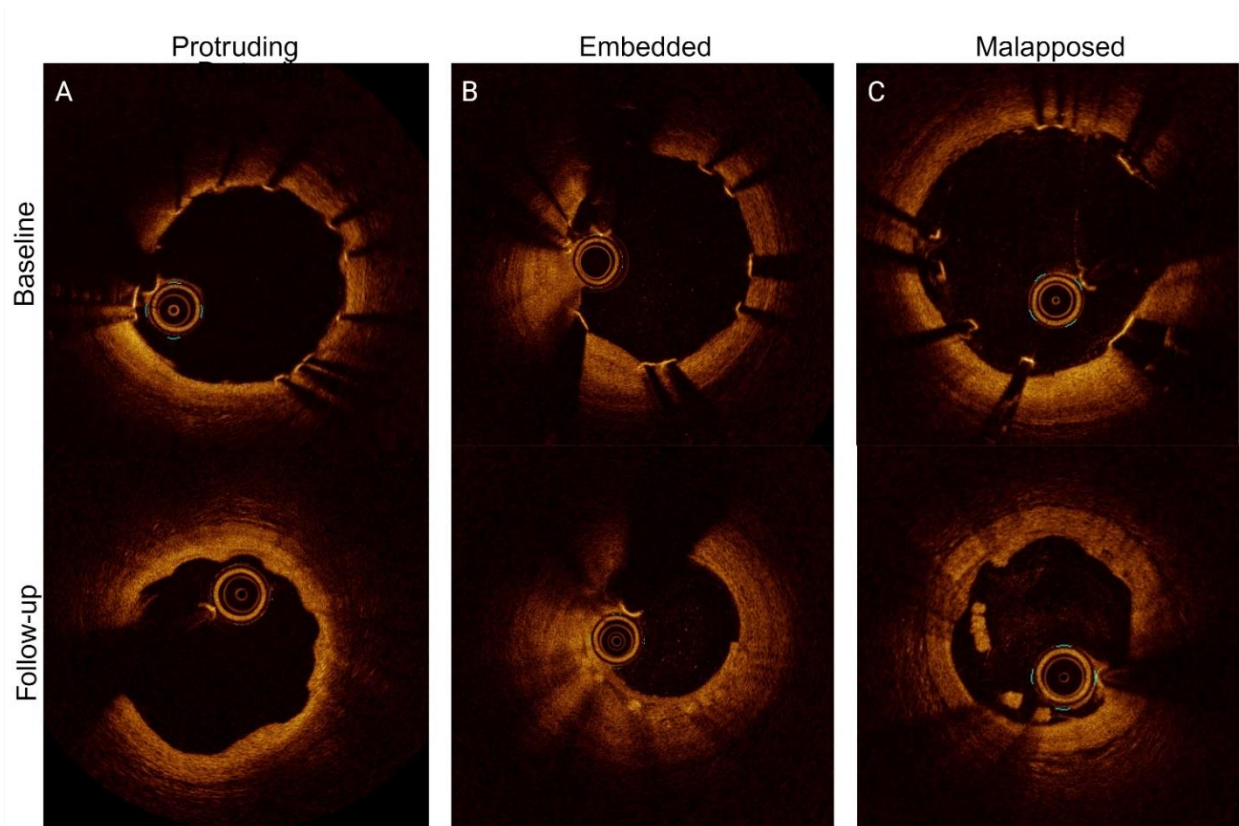

OCT images illustrating two categories of strut remnants at follow-up. Upper panel represents baseline images, and lower panel represents corresponding cross section at follow-up. (A) Protruding strut remnants: At baseline, all struts are well-apposed, and the cross sectional lumen area is 8.9 mm<sup>2</sup>. At 6-month follow-up, the strut remnants are visible from 10 to 6 o'clock as bumpy irregularities in the lumen contour, protruding into the lumen. The lumen area is 9.2 mm<sup>2</sup>. (B) Embedded strut remnants: At baseline, all struts are well-apposed, and the lumen area is 8.5 mm<sup>2</sup>. At 6-month follow-up, there are visible, covered embedded strut remnants from 5 to 9 o'clock. Scaffold recoil and neointimal growth contribute to lumen area reduction to 5.0 mm<sup>2</sup>. (C) Malapposed struts: At baseline, there are four malapposed struts from 6 to 9 o'clock, and at follow-up the strut remnants persist to be malapposed. Abbreviations: OCT = optical coherence tomography.

Figure S2: Correlation between  $\Delta$ lumen and  $\Delta$ vessel area and percentage of protruding and embedded remnants

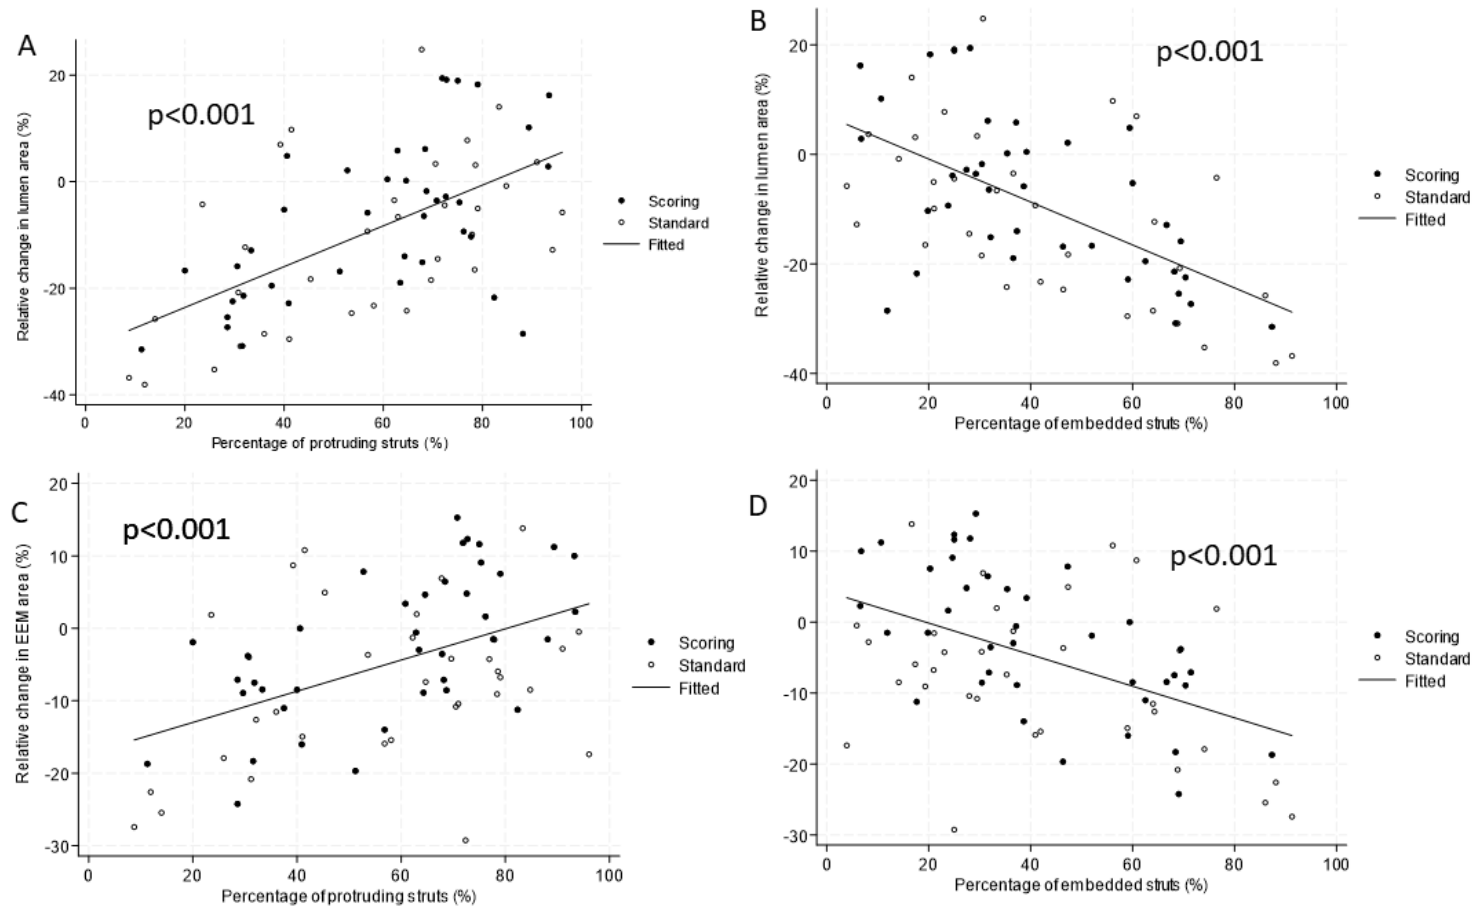

Correlation between relative change in lumen and vessel area vs. percentage protruding or embedded strut remnants. There is a positive correlation between A) change in lumen area and protruding strut remnants, and B) a negative correlation between change in lumen area and embedded strut remnants. There is a positive correlation between C) change in vessel area and protruding strut remnants, and D) a negative correlation between change in vessel area and embedded strut remnants. Abbreviations: EEM = external elastic membrane

| <b>Table S1: Exclusion criteria</b>                                                                                                                          |
|--------------------------------------------------------------------------------------------------------------------------------------------------------------|
| Ostial lesions (cannot be cleared with flushed contrast by OCT)                                                                                              |
| Significantly calcified lesions defined with an arc > 180° and calcium thickness > 0.5 mm and calcium length of > 5 mm evaluated with IVUS and/or OCT)       |
| Lesions longer than 40 mm                                                                                                                                    |
| Tortuous arteries where the PCI-operator estimated that the introduction of an OCT-catheter would not be possible or would be associated with increased risk |
| Allergy to aspirin, ticagrelor, clopidogrel, prasugrel or sirolimus                                                                                          |
| eGFR < 30 ml/min or creatinine > 150 µg/L (due to the required amount of contrast by OCT)                                                                    |
| Expected survival < 1 year                                                                                                                                   |
| Patients participating in other randomized stent studies                                                                                                     |
| Abbreviations: IVUS = Intravascular Ultrasound; OCT = Optical Coherence Tomography; PCI = Percutaneous Coronary Intervention                                 |

**Table S2: Intravascular ultrasound findings of the scaffold treated segment**

|                                        | Baseline           |                    |         | 6-month follow-up  |                    |         |
|----------------------------------------|--------------------|--------------------|---------|--------------------|--------------------|---------|
|                                        | Scoring balloon    | Standard balloon   | p-value | Scoring balloon    | Standard balloon   | p-value |
| No. of patients                        | 40                 | 38                 |         | 39                 | 34                 |         |
| Lumen measurements                     |                    |                    |         |                    |                    |         |
| Minimal lumen area, mm <sup>2</sup>    | 7.0 ± 1.2          | 6.8 ± 1.5          | 0.48    | 5.6 ± 1.2          | 5.2 ± 1.8          | 0.23    |
| Mean lumen area, mm <sup>2</sup>       | 8.4 ± 1.3          | 8.3 ± 1.6          | 0.59    | 7.7 ± 1.4          | 7.4 ± 2.3          | 0.42    |
| Total lumen volume, mm <sup>3</sup>    | 182.9 ± 47.2       | 187.8 ± 59.4       | 0.69    | 170.4 ± 61.8       | 159.6 ± 54.1       | 0.43    |
| Vessel measurements                    |                    |                    |         |                    |                    |         |
| EEM area at MLA site, mm <sup>2</sup>  | 14.7 ± 3.4         | 16.1 ± 4.9         | 0.13    | 13. ± 3.50         | 13.7 ± 4.7         | 0.86    |
| Mean EEM area, mm <sup>2</sup>         | 16.7 ± 2.9         | 17.0 ± 4.2         | 0.75    | 16.2 ± 3.2         | 15.6 ± 4.7         | 0.50    |
| Total EEM volume, mm <sup>3</sup>      | 361.6 ± 97.5       | 383.9 ± 130.2      | 0.40    | 353.9 ± 120.7      | 336.8 ± 111.0      | 0.53    |
| Scaffold measurement                   |                    |                    |         |                    |                    |         |
| Total no. of analyzed struts           | 140.9 ± 42.2       | 150.7 ± 30.8       | 0.24    | 108.0 ± 28.1       | 109.1 ± 27.3       | 0.86    |
| Scaffold length, mm                    | 20.9 [17.4 ; 24.1] | 21.4 [20.0 ; 25.5] | 0.20    | 21.2 [14.0 ; 36.3] | 21.6 [13.7 ; 33.6] | 0.70    |
| Minimal scaffold area, mm <sup>2</sup> | 7.7 ± 1.4          | 7.5 ± 1.7          | 0.62    | 6.9 ± 1.5          | 6.4 ± 2.0          | 0.21    |
| Mean scaffold area, mm <sup>2</sup>    | 9.4 ± 1.6          | 9.2 ± 2.0          | 0.75    | 9.7 ± 1.6          | 8.8 ± 2.5          | 0.08    |
| Total scaffold volume, mm <sup>3</sup> | 202.5 ± 52.2       | 209.2 ± 64.2       | 0.61    | 211.6 ± 69.2       | 190.7 ± 61.3       | 0.18    |

Abbreviations: EEM = external elastic membrane, MLA = minimal lumen area
